# Supplementary material for: Facile and selective synthesis of aldehyde end-functionalized polymers using a combination of catalytic chain transfer and rhodium catalyzed hydroformylation
Source: Royal Society of Chemistry journal article supplement (doi:10.1039/c0py00111b), 2010-01-01
Supplement: c0py00111b.pdf [file c0py00111b.pdf]

## SUPPORTING INFORMATION

### Facile and Selective Synthesis of Aldehyde End-Functionalized Polymers Using a Combination of Catalytic Chain Transfer and Rhodium Catalyzed Hydroformylation.

Niels M.B. Smeets,<sup>†</sup> Jan Meuldijk, Johan P.A. Heuts, Ard C.J. Koeken,<sup>\*,‡</sup>

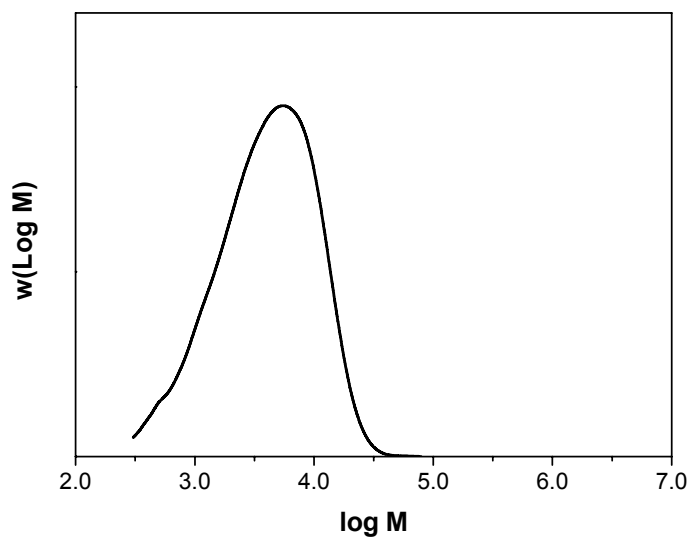

**Fig. S1.** The SEC chromatogram of the poly(styrene) macromonomer.

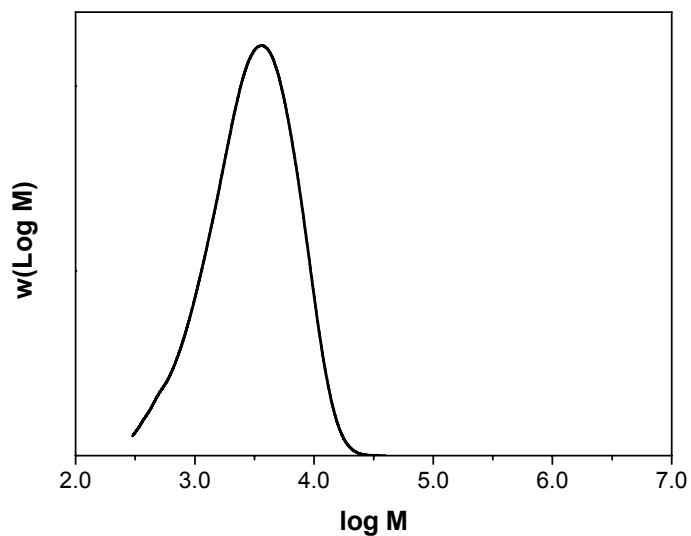

**Fig. S2.** The SEC chromatogram of the poly(styrene-co-alpha methyl styrene) macromonomer.

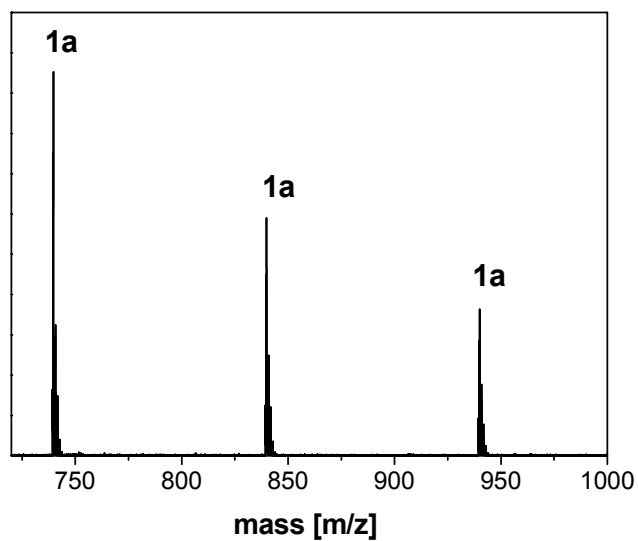

**Fig. S3.** The MALDI-ToF-MS spectrum of the pMMA macromonomer, where (**1a**)  $\text{H-(MMA)}_n\text{-CH}_2\text{-C(CO-O-CH}_3\text{)=CH}_2$

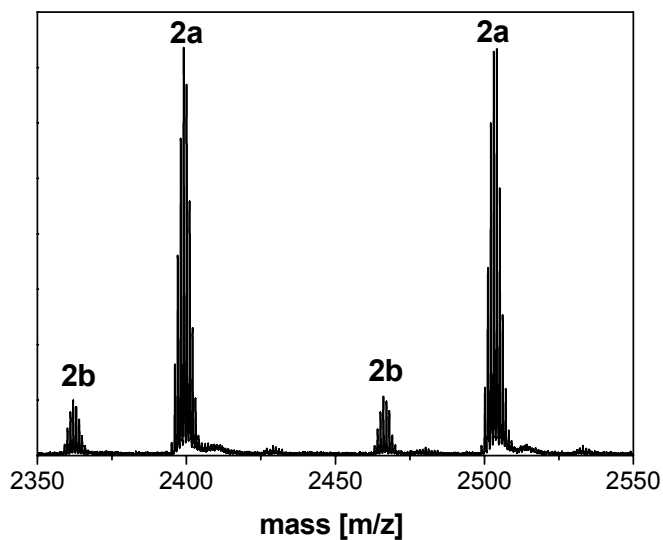

**Fig. S4.** The MALDI-ToF-MS spectrum of the pS macromonomer, where **(2a)**  $\text{H}-(\text{STY})_n-\text{CH}_2=\text{C}(\text{C}_6\text{H}_5)\text{H}$  and **(2b)**  $\text{NC}(\text{CH}_3)_2-(\text{STY})_n-\text{CH}_2=\text{C}(\text{C}_6\text{H}_5)\text{H}$

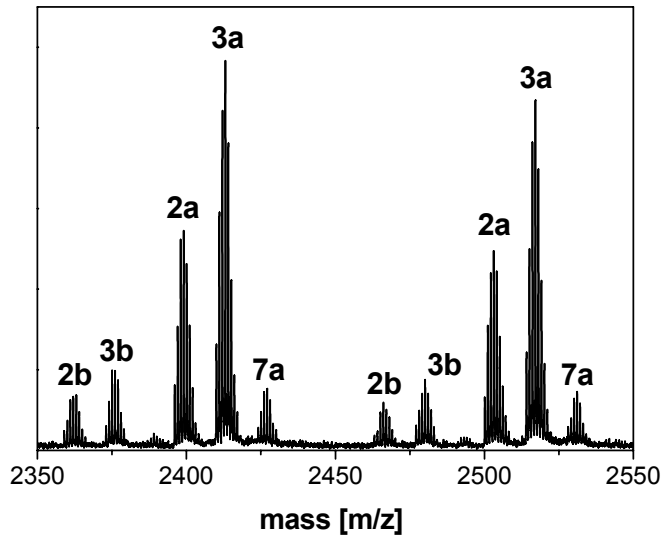

**Fig. S5.** The MALDI-ToF-MS spectrum of the p(S-co-AMS) macromonomer, where **(2a)**  $\text{H}-(\text{STY})_n-\text{CH}_2=\text{C}(\text{C}_6\text{H}_5)\text{H}$ ; **(2b)**  $\text{NC}(\text{CH}_3)_2-(\text{STY})_n-\text{CH}_2=\text{C}(\text{C}_6\text{H}_5)\text{H}$ ; **(3a)**  $\text{H}-(\text{STY})_n-$

Supplementary Material (ESI) for Polymer Chemistry  
This journal is (c) The Royal Society of Chemistry 2010

$\text{CH}_2\text{-C}(\text{C}_6\text{H}_5)=\text{CH}_2$ ; **(3b)**  $\text{NC}(\text{CH}_3)_2\text{-(STY)}_n\text{-CH}_2\text{-C}(\text{C}_6\text{H}_5)=\text{CH}_2$  and **(7a)**  $\text{H-(STY)}_n\text{-}$   
 $(\text{AMS})_1\text{-CH}_2\text{-C}(\text{C}_6\text{H}_5)=\text{CH}_2$
